# Supplementary material
Source: publisher site journal article supplement (https://www.dovepress.com/article/594609)
Supplement: Supplementary file 1 [file 594609%20Revised%20Supplementary%20Material.docx]

**Supplementary**

Online Supplement S1. STROBE Statement – Checklist of items that should be included in reports of cohort studies

|  | Item No | Recommendation | Page No |
| --- | --- | --- | --- |
| **Title and abstract** | 1 | (*a*) Indicate the study’s design with a commonly used term in the title or the abstract | 1-2 |
| (*b*) Provide in the abstract an informative and balanced summary of what was done and what was found | 2 |
| Introduction | | | |
| Background/rationale | 2 | Explain the scientific background and rationale for the investigation being reported | 3 |
| Objectives | 3 | State specific objectives, including any prespecified hypotheses | 4 |
| Methods | | | |
| Study design | 4 | Present key elements of study design early in the paper | 4 |
| Setting | 5 | Describe the setting, locations, and relevant dates, including periods of recruitment, exposure, follow-up, and data collection | 4 |
| Participants | 6 | (*a*) Give the eligibility criteria, and the sources and methods of selection of participants. Describe methods of follow-up | 5 |
| (*b*)For matched studies, give matching criteria and number of exposed and unexposed | NA |
| Variables | 7 | Clearly define all outcomes, exposures, predictors, potential confounders, and effect modifiers. Give diagnostic criteria, if applicable | 5 |
| Data sources/ measurement | 8 | For each variable of interest, give sources of data and details of methods of assessment (measurement). Describe comparability of assessment methods if there is more than one group | 6 |
| Bias | 9 | Describe any efforts to address potential sources of bias | 9 |
| Study size | 10 | Explain how the study size was arrived at | 5 |
| Quantitative variables | 11 | Explain how quantitative variables were handled in the analyses. If applicable, describe which groupings were chosen and why | 5 |
| Statistical methods | 12 | (*a*) Describe all statistical methods, including those used to control for confounding | 7 |
| (*b*) Describe any methods used to examine subgroups and interactions | 7 |
| (*c*) Explain how missing data were addressed | 7 |
| (*d*) If applicable, explain how loss to follow-up was addressed | 7 |
| (*e*) Describe any sensitivity analyses | NA |
| Results | | |  |
| Participants | 13 | (a) Report numbers of individuals at each stage of study—eg numbers potentially eligible, examined for eligibility, confirmed eligible, included in the study, completing follow-up, and analysed | 7 |
| (b) Give reasons for non-participation at each stage | 7 |
| (c) Consider use of a flow diagram | 7 |
| Descriptive data | 14 | (a) Give characteristics of study participants (eg demographic, clinical, social) and information on exposures and potential confounders | **7** |
| (b) Indicate number of participants with missing data for each variable of interest | 7 |
| (c) Summarise follow-up time (eg, average and total amount) | 7 |
| Outcome data | 15 | Report numbers of outcome events or summary measures over time | 8 |
| Main results | 16 | (*a*) Give unadjusted estimates and, if applicable, confounder-adjusted estimates and their precision (eg, 95% confidence interval). Make clear which confounders were adjusted for and why they were included | 8 |
|  |  | (*b*) Report category boundaries when continuous variables were categorized | 8 |
|  |  | (*c*) If relevant, consider translating estimates of relative risk into absolute risk for a meaningful time period | NA |
| Other analyses | 17 | Report other analyses done—eg analyses of subgroups and interactions, and sensitivity analyses | NA |
| Discussion |  |  |  |
| Key results | 18 | Summarise key results with reference to study objectives | 8 |
| Limitations | 19 | Discuss limitations of the study, taking into account sources of potential bias or imprecision. Discuss both direction and magnitude of any potential bias | 10 |
| Interpretation | 20 | Give a cautious overall interpretation of results considering objectives, limitations, multiplicity of analyses, results from similar studies, and other relevant evidence | 9-10 |
| Generalisability | 21 | Discuss the generalisability (external validity) of the study results | 9-10 |
| Other information |  |  |  |
| Funding | 22 | Give the source of funding and the role of the funders for the present study and, if applicable, for the original study on which the present article is based | 12 |

**Online Supplement S2.** Availability of Utstein variables in the Danish Drowning Cohort by original data source

| **Utstein Table A: Patient information** | |
| --- | --- |
| Identifier | DPMR |
| Sex | DPMR |
| Age | DPMR |
| Race/ethnicitya | Danish Civil Registration System |
| Incident date and time of day | DPMR |
| Precipitating event | DPMR |
| Face submerged | DPMR |
| Preexisting illness | IHMR |
| **Utstein Table B: Scene information** | |
| Water temperature | DPMR |
| Witnessed drowning | DPMR |
| Bystander CPR | DPMR |
| CPR methoda | Unavailable |
| Bystander ventilation | Unavailable |
| Trained 1st responder | Unavailable |
| Vital status | DPMR |
| Initial cardiac rhythm | DPMR |
| Vital signsa | DPMR |
| Pulmonary statusa | DPMR |
| Type of watera | DPMR |
| Body of watera | DPMR |
| **Utstein Table C: Pre-EMS scene information (Lifeguards and First responders)** | |
| Medical knowledge | Unavailable |
| Interventions | Unavailable |
| Rescuer = caregivera | DPMR |
| Number of lifeguardsa | Unavailable |
| Water conditionsa | Unavailable |
| Rescue methodsa | Unavailable |
| **Utstein Table D: Time points and time intervals from first responder or EMS data** | |
| Time face underwater | Unavailable |
| Time removed from water | Unavailable |
| Time of first treatment | DPMR |
| Time CPR begun | Unavailable |
| Time ROSC achieved | DPMR |
| Time first conscious | Unavailable |
| Submersion duration | DPMR |
| Time underwater to first EMS treatment | Unavailable |
| **Utstein Table E: Hospital Course, Core data** | |
| Date and time of hospital arrival | IHMR |
| CPR ongoing at hospital arrival | DPMR |
| Duration of CPR | IHMR |
| First documented vital signs after hospital arrival | IHMR |
| First cardiac rhythm after hospital arrival | IHMR |
| Initial hospital neurological examination | IHMR |
| Arterial blood gas analysis | IHMR |
| Pulmonary edema/ARDS | IHMR |
| Airway and ventilation requirements | IHMR |
| ICU admission | IHMR |
| Induced hypothermia | IHMR |
| Temperature management | IHMR |
| Temperature peak/trough | IHMR |
| Serum glucose levels | IHMR |
| Hypotension | IHMR |
| Circulatory support | IHMR |
| ECMO/CPB | IHMR |
| Neurological function | IHMR |
| In-hospital resuscitation | IHMR |
| Complicating illness of drowning | IHMR |
| **Utstein Table F: Hospital Course, Supplementary data** | |
| If CPR was not ongoing on arrival, why? | DPMR |
| Time CPR stopped in emergency department | IHMR |
| Number of defibrillation attempts after hospital arrival | IHMR |
| Initial neurological function: FOUR score | Unavailable |
| Serum lactate | IHMR |
| Potassium level | IHMR |
| Prior substance abuse | IHMR |
| Blood alcohol level | IHMR |
| Oxygenation | IHMR |
| Temperature goal | IHMR |
| Neurological function tests | IHMR |
| **Utstein Table G: Disposition** | |
| Date of hospital discharge | IHMR |
| Vital status at discharge | IHMR |
| Cause of death, if patient did not survive | IHMR |
| Neurological outcome at hospital discharge, if patient survived | Unavailable |
| If patient died in the hospital: How did patient die?a | IHMR |
| If patient died in the hospital: Was an autopsy performed?a | IHMR |
| If patient died in the hospital: Channelopathy evaluation?a | IHMR |
| If patient survived to hospital discharge: Neurological and quality-of-life outcomes 6 months after hospital dischargea | Unavailable |
| **Utstein Table H: Quality of Resuscitation Factors** | |
| Ventilation method | DPMR |
| Ventilation ratea | Unavailable |
| Compression ratea | Unavailable |
| Compression fractiona | Unavailable |
| Compression deptha | Unavailable |
| Pre-shock pause intervala | Unavailable |
| *Legend: Table showing the data source for all Utstein variables in the Danish setting. Abbreviations: CPR = CardioPulmonary Resuscitation, IHMR = In-Hospital Medical Record system, DPMR = Danish Prehospital Medical Record system, EMS = Emergency Medical Services, ROSC = Return Of Spontaneous Circulation, SaO2 = Peripheral oxygen saturation. Footnotes: a = Supplementary variable.* | |
